# Supplementary material
Source: HighWire-hosted journal article supplement (http://www.qdcxjkg.com/highwire/filestream/113680/field_highwire_adjunct_files/0/ERJ-00606-2012_Disclosures.pdf)
Supplement: ERJ-00606-2012_Disclosures.pdf [file ERJ-00606-2012_Disclosures.pdf]

**R.P. Baughman** has received research grants to study treatment for sarcoidosis from Cephalon, Centocor, Celgene, Actelion, and Gilead. He has also acted as a consultant regarding therapy for sarcoidosis for Mondobiotech and GlaxoSmithKline.

**E.E. Lower** has received research grants to study treatment for sarcoidosis from Cephalon, Centocor, Celgene, Actelion, and Gilead.
